# Supplementary material for: 3D hierarchical networks constructed from interlayer-expanded MoS2 nanotubes and rGO as high-rate and ultra-stable anodes for lithium/sodium-ion batteries
Source: Royal Society of Chemistry journal article supplement (doi:10.1039/d3tc02333h), 2023-01-01
Supplement: d3tc02333h1.pdf [file d3tc02333h1.pdf]

## Supporting Information

### **3D Hierarchical Networks Constructed from Interlayer-Expanded MoS<sub>2</sub> Nanotubes and rGO as High-Rate and Ultra-Stable Anodes for Lithium/Sodium-Ion Batteries**

Bingqing Ye<sup>1</sup>, Zhou Cui<sup>2</sup>, Zunxian Yang<sup>\*,1,3</sup>, Wenbo Wu<sup>1</sup>, Yuliang Ye<sup>1</sup>, Zihong Shen<sup>1</sup>, Yuanqing Zhou<sup>1</sup>, Qiaocan Huang<sup>1</sup>, Songwei Ye<sup>1</sup>, Zhiming Cheng<sup>1</sup>, Hongyi Hong<sup>1</sup>, Zongyi Meng<sup>1</sup>, Zhiwei Zeng<sup>1</sup>, Qianting Lan<sup>1</sup>, Jiaxiang Wang<sup>1</sup>, Ye Chen<sup>1</sup>, Hui Zhang<sup>1</sup>, Tailiang Guo<sup>1,3</sup>, Yun Ye<sup>1,3</sup>, Baisheng Sa<sup>\*\*,2</sup>, Zhenzhen Weng<sup>4</sup>, Yongyi Chen<sup>4</sup>

<sup>1</sup>National & Local United Engineering Laboratory of Flat Panel Display Technology, Fuzhou University, Fuzhou 350108, P. R. China.

<sup>2</sup>Multiscale Computational Materials Facility, and Key Laboratory of Eco-materials Advanced Technology, College of Materials Science and Engineering, Fuzhou University, Fuzhou 350100, P. R. China

<sup>3</sup>Mindu Innovation Laboratory, Fujian Science & Technology Innovation Laboratory For Optoelectronic Information of China, Fuzhou, 350108, P.R. China

<sup>4</sup>Department of Physics, School of Physics and Information Engineering, Fuzhou University

Number of pages: 22

Number of figures: 15

Number of tables: 3

### Captions

**Fig.S1 (a, b)** Low-magnification and **(c)** High-magnification SEM image of MoS<sub>2</sub> nanotubes. **(d)** SEM image of MoS<sub>2</sub>@GO-2 composite.

**Fig.S2** FTIR spectra of the as-prepared MoS<sub>2</sub> nanotubes.

**Fig.S3** High-magnification SEM images of NC-MoS<sub>2</sub>@rGO-2 composite.

**Fig.S4** TEM images of NC-MoS<sub>2</sub>@rGO-2 composite.

**Fig.S5 (a, b)** Low-magnification images, **(c, d)** High-magnification SEM images, **(e-g)** TEM images, **(h)** HRTEM image, and **(i-m)** EDS mapping of NC-MoS<sub>2</sub> nanotubes.

**Fig.S6 (a)** Low-magnification and **(b, c)** High-magnification SEM images of NC-MoS<sub>2</sub>@rGO-1 nanotubes. **(d)** Low-magnification and **(e, f)** High-magnification SEM images of NC-MoS<sub>2</sub>@rGO-3 composite.

**Fig.S7** XRD patterns of MoS<sub>2</sub> nanotubes and MoS<sub>2</sub>@GO-2 composite.

**Fig.S8** Discharge/charge voltage profiles of NC-MoS<sub>2</sub>@rGO-2 electrode at different current densities for LIBs.

**Fig.S9** Long-term cycling stability of NC-MoS<sub>2</sub>@rGO-2 electrode at 1 A g<sup>-1</sup> for LIBs.

**Fig.S10** Cycling performance of NC-MoS<sub>2</sub>, NC-MoS<sub>2</sub>@rGO-1, NC-MoS<sub>2</sub>@rGO-2

and NC-MoS<sub>2</sub>@rGO-3 electrodes at 1 A g<sup>-1</sup> for LIBs.

**Fig.S11** Long-term cycling stability of NC-MoS<sub>2</sub>@rGO-2 electrode at 10 A g<sup>-1</sup> for LIBs.

**Fig.S12 (a)** Low-magnification and **(b)** High-magnification SEM images of NC-MoS<sub>2</sub>@rGO-2 composite after 500 cycles at 2 A g<sup>-1</sup>.

**Fig.S13 (a)** EIS and **(f)** the corresponding relationship plots between Z' and  $\omega^{-1/2}$  of NC-MoS<sub>2</sub>@rGO-2 electrodes before cycles. **(c)** plots of Z' vs.  $\omega^{-1/2}$  after different cycles at 0.2 A g<sup>-1</sup> for LIBs.

**Fig.S14** E versus t profile of NC-MoS<sub>2</sub>@rGO-2 electrode for a single GITT during the lithiation process.

**Fig.S15 (a)** EIS and **(b)** Linear fits (relationship plot between Z' and  $\omega^{-1/2}$ ) in the low-frequency region of NC-MoS<sub>2</sub>@rGO-2 electrode before cycles for NIBs.

**Table S1** Comparison of the cycling performance of NC-MoS<sub>2</sub>@rGO-2 with the relevant anode materials for Li-ion batteries in the recently reported literature.

**Table S2** Fitting parameters of NC-MoS<sub>2</sub>@rGO-2 electrode for LIBs after different cycles.

**Table S3** Comparison of the cycling performance of NC-MoS<sub>2</sub>@rGO-2 with the recently reported MoS<sub>2</sub>-based anode materials for Na-ion batteries in other literature.

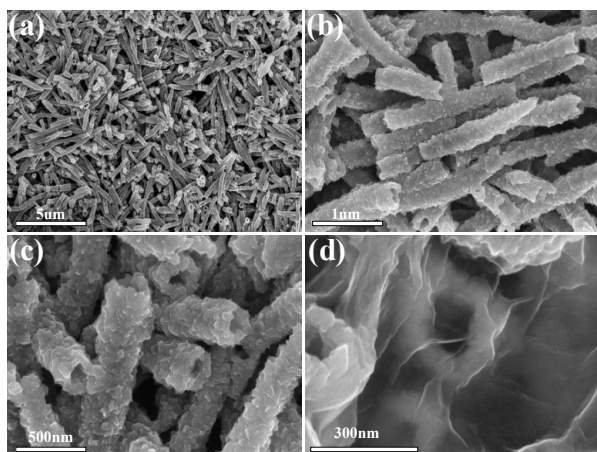

**Fig.S1**

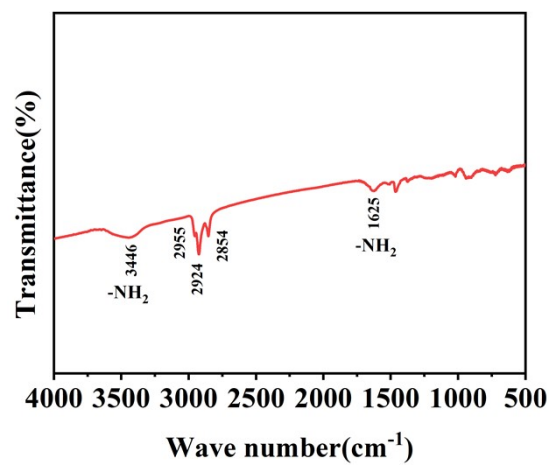

**Fig.S2**

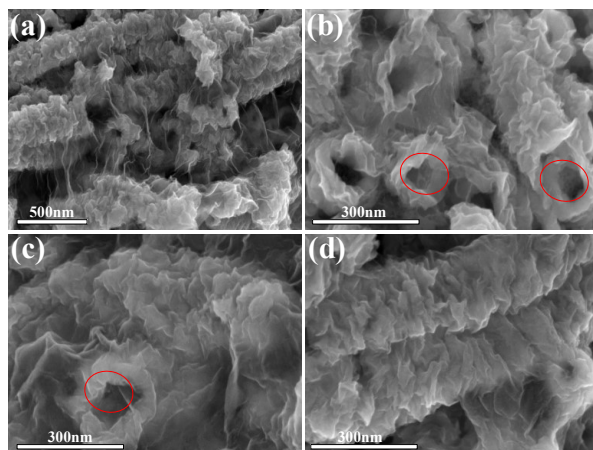

**Fig.S3**

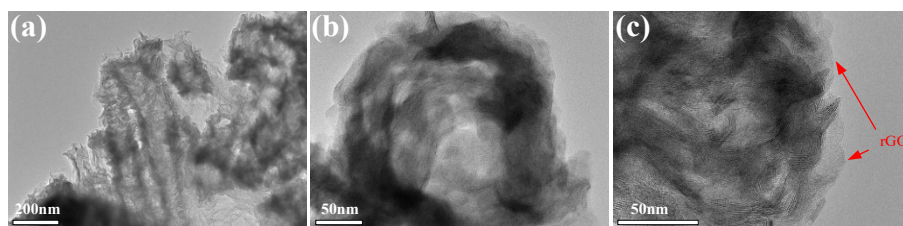

**Fig.S4**

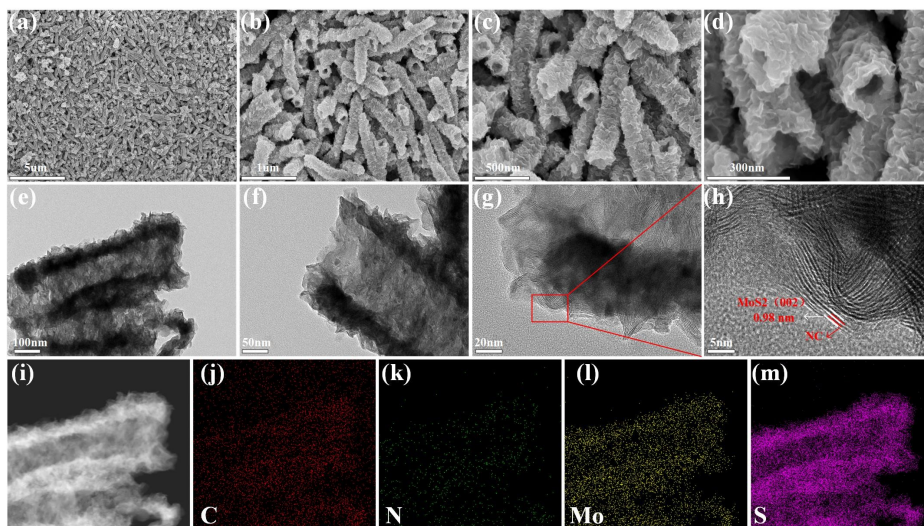

**Fig.S5**



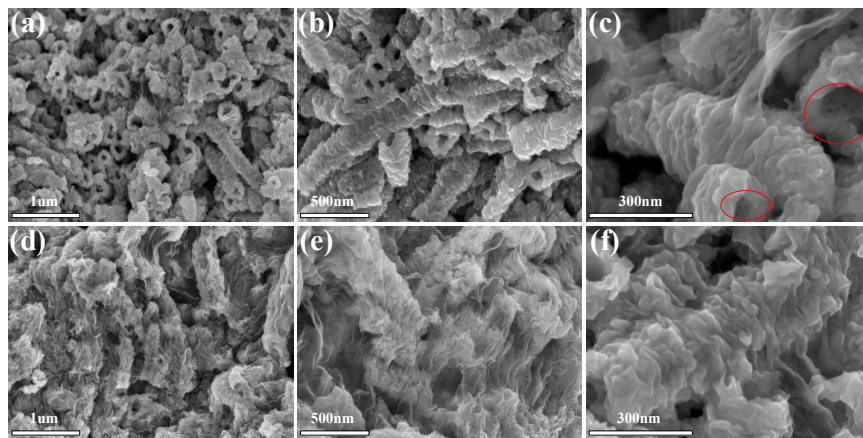

**Fig.S6**

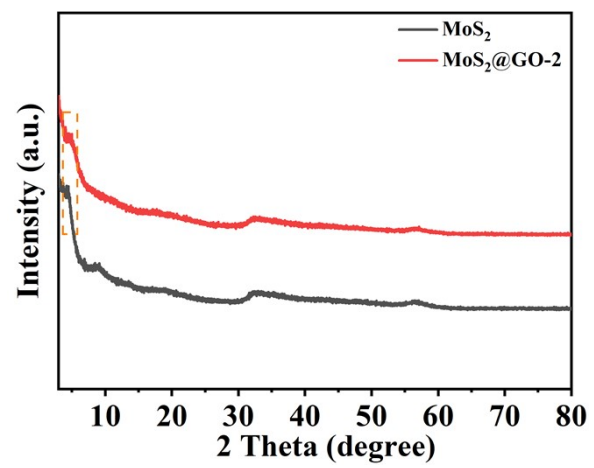

Fig.S7

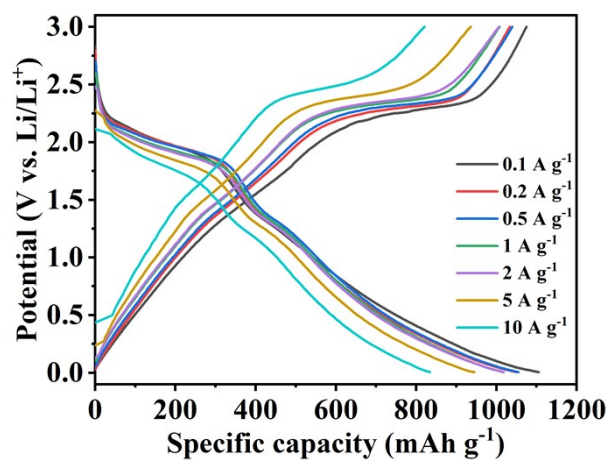

**Fig.S8**

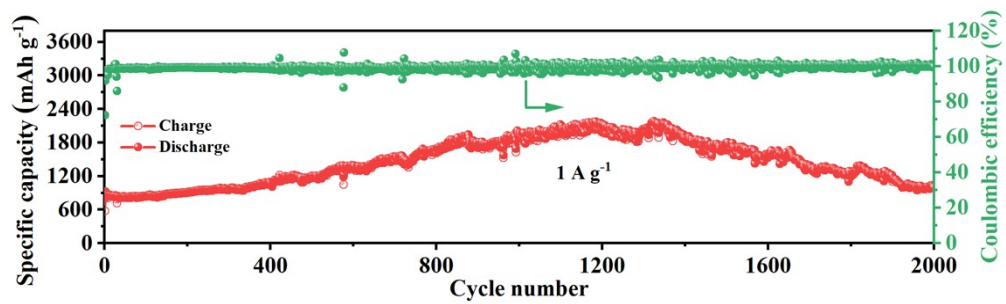

**Fig.S9**

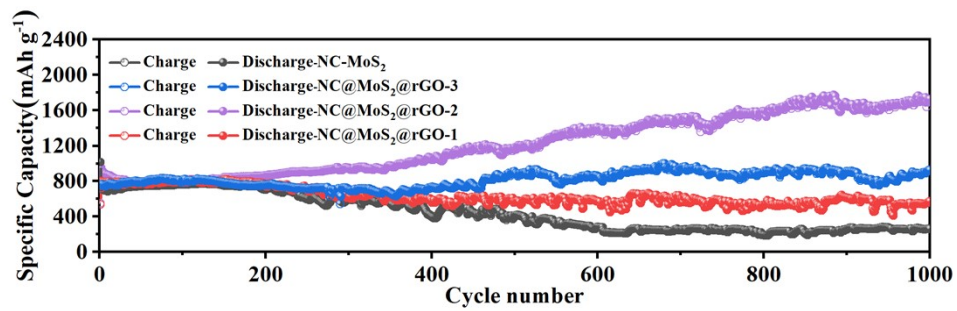

**Fig.S10**

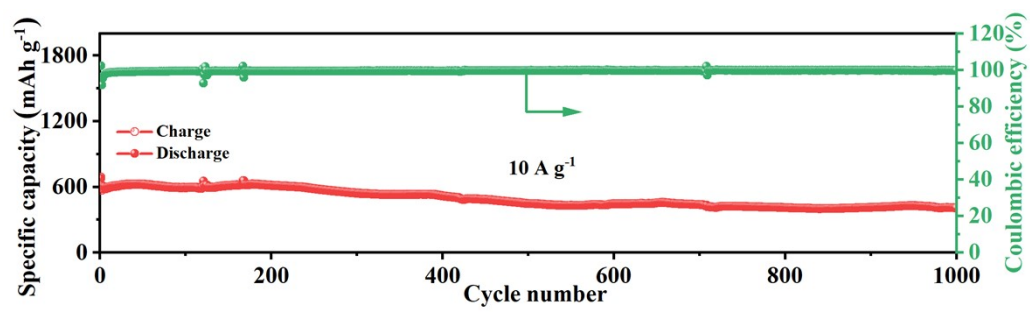

**Fig.S11**

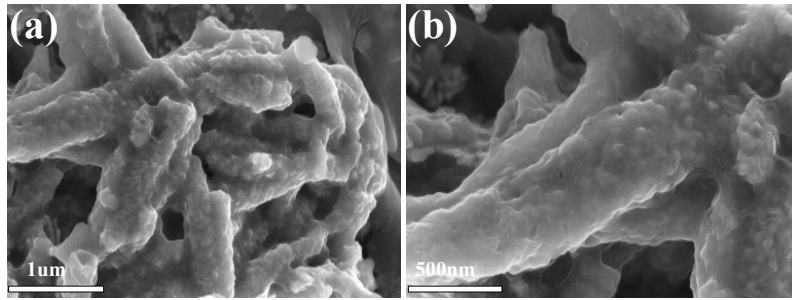

**Fig.S12**

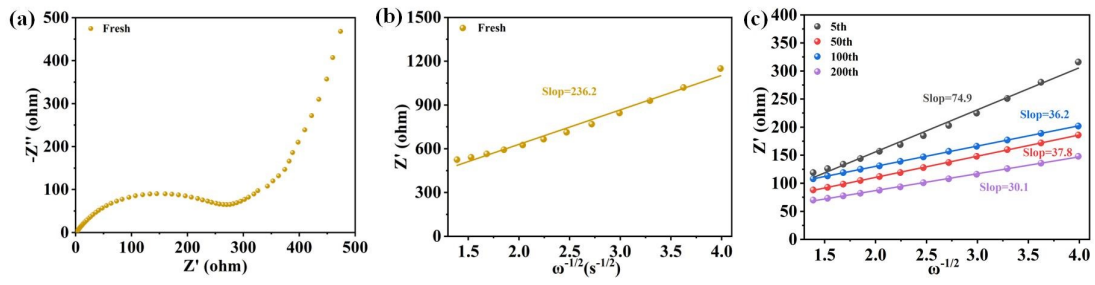

Fig.S13



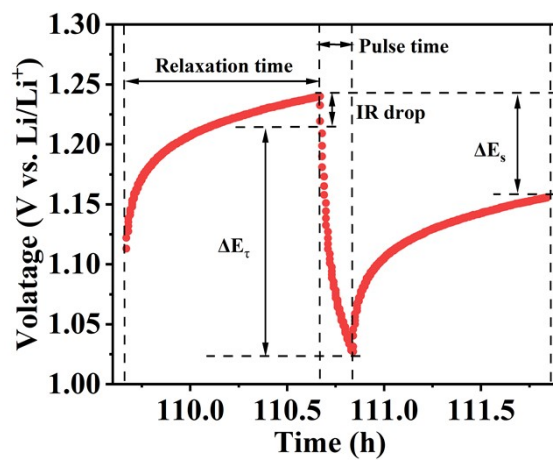

Fig.S14

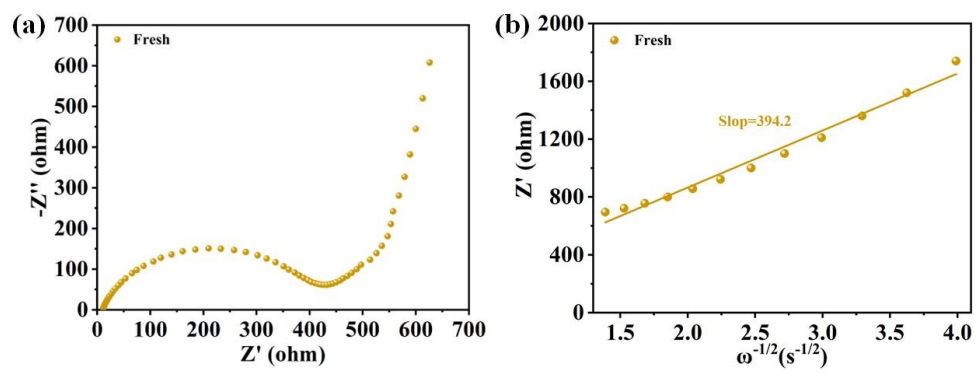

Fig.S15

**Table S1**

| Materials                                                       | Current density<br>(mA $g^{-1}$ ) | (Cycles) | Capacity<br>(mAh $g^{-1}$ ) | Reference |
|-----------------------------------------------------------------|-----------------------------------|----------|-----------------------------|-----------|
| N-GRs/MoS <sub>2</sub>                                          | 500                               | 200      | 925                         | [1]       |
|                                                                 | 2000                              | 600      | 547                         |           |
| WS <sub>2</sub> /MoS <sub>2</sub> @C/rGO<br>hollow microspheres | 500                               | 450      | 1036.5                      | [2]       |
|                                                                 | 1000                              | 550      | 701.8                       |           |
| 3D NCMTs@A-<br>MoS <sub>2</sub> /RGO composite                  | 1000                              | 1000     | 544                         | [3]       |
| MoS <sub>2</sub> /C@G hybrid<br>nanosheet                       | 100                               | 500      | 691.7                       | [4]       |
|                                                                 | 500                               | 1000     | 662.7                       |           |
| MoS <sub>2</sub> /graphene                                      | 100                               | 150      | 813                         | [5]       |
| MoS <sub>2</sub> /m-C porous-hollow<br>nanorods                 | 200                               | 100      | 1170                        | [6]       |
|                                                                 | 1000                              | 100      | 970                         |           |
|                                                                 | 1250                              | 350      | 951                         |           |
| 1T'-MoS <sub>2</sub> /rhGO                                      | 200                               | 200      | 1092                        | [7]       |
|                                                                 | 5000                              | 2000     | 635                         |           |
| G-MoS <sub>2</sub> composite                                    | 5000                              | 1500     | 539.9                       | [8]       |
| CNT@NCT@W-MoS <sub>2</sub> /C                                   | 500                               | 200      | 734                         | [9]       |
| MoS <sub>2</sub> @rGO-CNTs                                      | 200                               | 200      | 1226                        | [10]      |
|                                                                 | 5000                              | 1000     | 745                         |           |
| M(S+C)/rGO                                                      | 500                               | 200      | 1089                        | [11]      |
|                                                                 | 5000                              | 200      | 696                         |           |
| NC-MoS <sub>2</sub> @rGO-2                                      | 200                               | 200      | 1308.6                      | This work |
|                                                                 | 200                               | 500      | 1115.4                      |           |
|                                                                 | 1000                              | 2000     | 1034.3                      |           |
|                                                                 | 2000                              | 1500     | 774                         |           |
|                                                                 | 5000                              | 6590     | 528.4                       |           |
|                                                                 | 10000                             | 500      | 407.9                       |           |

**Table S2**

| Number of cycles                        | 0     | 5     | 50    | 100  | 200   |
|-----------------------------------------|-------|-------|-------|------|-------|
| $R_{ct}$ ( $\Omega$ )                   | 316.3 | 60.45 | 53.21 | 30.8 | 25.54 |
| $\sigma_w$ ( $\Omega$ s <sup>-1</sup> ) | 236.2 | 74.9  | 37.8  | 36.2 | 30.1  |

**Table S3**

| Materials                                                       | Current density<br>(mA $g^{-1}$ ) | (Cycles) | Capacity<br>(mAh $g^{-1}$ ) | Reference |
|-----------------------------------------------------------------|-----------------------------------|----------|-----------------------------|-----------|
| WS <sub>2</sub> /MoS <sub>2</sub> @C/rGO<br>Hollow microspheres | 100                               | 180      | 470.6                       | [2]       |
|                                                                 | 500                               | 250      | 411.8                       |           |
|                                                                 | 1000                              | 280      | 372.8                       |           |
| MoS <sub>2</sub> @RGO                                           | 500                               | 200      | 253.1                       | [12]      |
| MoS <sub>2</sub> @N-RGO                                         | 200                               | 200      | 328                         | [13]      |
|                                                                 | 1000                              | 300      | 250                         |           |
| MoS <sub>2</sub> /m-C@a-C@Ti <sub>3</sub> C <sub>2</sub>        | 1000                              | 500      | 331                         | [14]      |
|                                                                 | 2000                              | 2000     | 212                         |           |
| MoS <sub>2</sub> /m-C porous-hollow<br>nanorods                 | 200                               | 300      | 397                         | [6]       |
|                                                                 | 500                               | 500      | 350                         |           |
| SnS <sub>2</sub> @MoS <sub>2</sub> @rGO                         | 100                               | 100      | 396                         | [15]      |
| G-MoS <sub>2</sub> composite                                    | 1000                              | 200      | 256                         | [8]       |
| CNT@NCT@W-MoS <sub>2</sub> /C                                   | 1000                              | 100      | 335                         | [9]       |
|                                                                 | 2000                              | 100      | 283                         |           |
| rGO/MoS <sub>2</sub>                                            | 1000                              | 300      | 362.5                       | [16]      |
| MoS <sub>2</sub> @rGO composites                                | 1000                              | 300      | 417.2                       | [17]      |
|                                                                 | 2000                              | 500      | 289.5                       |           |
| Ex-MoS <sub>2</sub> /RGO@C                                      | 100                               | 150      | 415                         | [18]      |
| MoS <sub>2</sub> -G microflower                                 | 200                               | 100      | 500                         | [19]      |
| MoS <sub>2</sub> -C@C                                           | 500                               | 400      | 463                         | [20]      |
|                                                                 | 2000                              | 1000     | 312                         |           |
| NC-MoS <sub>2</sub> @rGO-2                                      | 200                               | 200      | 554.8                       | This work |
|                                                                 | 1000                              | 1000     | 463.6                       |           |
|                                                                 | 2000                              | 1500     | 383.2                       |           |

## References

- [1] Z. P. Xiao, L. Z. Sheng, L. L. Jiang, Y. Y. Zhao, M. H. Jiang, X. Zhang, M. Y. Zhang, J. Y. Shi, Y. Q. Lin, Z. J. Fan, Nitrogen-doped graphene ribbons/MoS<sub>2</sub> with ultrafast electron and ion transport for high-rate Li-ion batteries. **Chemical Engineering Journal**, **2021**, **408**: 127269.
- [2] Y. Rao, J. Wang, P. H. Liang, H. J. Zheng, M. Wu, J. T. Chen, F. Shi, K. Yan, J. S. Liu, K. Bian, C. X. Zhang, K. J. Zhu, Heterostructured WS<sub>2</sub>/MoS<sub>2</sub>@carbon hollow microspheres anchored on graphene for high-performance Li/Na storage. **Chemical Engineering Journal**, **2022**, **443**: 136080.
- [3] X. J. Liu, X. T. Zhang, S. H. Ma, S. S. Tong, X. J. Han, H. Wang, Flexible amorphous MoS<sub>2</sub> nanoflakes/N-doped carbon microtubes/reduced graphite oxide composite paper as binder free anode for full cell lithium ion batteries. **Electrochimica Acta**, **2020**, **333**: 135568.
- [4] B. Lan, X. Q. Zhang, Y. S. Wang, C. C. Wei, G. W. Wen, Constructing highly stable lithium storage materials by improving the bond strength of MoS<sub>2</sub> to graphene via chitosan. **Carbon**, **2022**, **192**: 384-394.
- [5] R. I. Pushparaj, D. Cakir, X. Zhang, S. Xu, M. Mann, X. D. Hou, Coal-Derived Graphene/MoS<sub>2</sub> Heterostructure Electrodes for Li-Ion Batteries: Experiment and Simulation Study. **Acs Applied Materials & Interfaces**, **2021**, **13**(50): 59950-59961.
- [6] L. Y. Jing, G. Lian, J. R. Wang, M. W. Zhao, X. Z. Liu, Q. L. Wang, D. L. Cui, C. P. Wong, Porous-hollow nanorods constructed from alternate intercalation of carbon

and MoS<sub>2</sub> monolayers for lithium and sodium storage. **Nano Research**, **2019**, **12**(8): 1912-1920.

[7] Z. J. Mi, D. M. Hu, J. Y. Lin, H. Pan, Z. X. Chen, Y. Li, Q. L. Liu, S. M. Zhu, Anchoring nanoarchitectonics of 1T'-MoS<sub>2</sub> nanoflakes on holey graphene sheets for lithium-ion batteries with outstanding high-rate performance. **Electrochimica Acta**, **2022**, **403**: 139711.

[8] Y. Li, S. Jiang, Y. Qian, X. D. Yan, J. Zhou, Z. Yi, N. Lin, Y. T. Qian, 2D interspace confined growth of ultrathin MoS<sub>2</sub>-intercalated graphite hetero-layers for high-rate Li/K storage. **Nano Research**, **2021**, **14**(4): 1061-1068.

[9] Y. H. Wang, Y. Yang, D. Y. Zhang, Y. B. Wang, X. K. Luo, X. M. Liu, J. K. Kim, Y. S. Luo, Inter-overlapped MoS<sub>2</sub>/C composites with large-interlayer-spacing for high-performance sodium-ion batteries. **Nanoscale Horizons**, **2020**, **5**(7): 1127-1135.

[10] J. Xia, R. X. Li, T. S. Wang, P. H. Yang, H. L. Zhou, J. J. Li, G. Y. Xiong, Y. L. Xing, S. C. Zhang, Structure-designed synthesis of 3D MoS<sub>2</sub> anchored on ionic liquid modified rGO-CNTs inspired by a honeycomb for excellent lithium storage. **Journal of Materials Chemistry A**, **2020**, **8**(9): 4868-4876.

[11] S. Mathialagan, P. G. Priya, Mo<sub>2</sub>C-MoS<sub>2</sub> embedded reduced graphene oxide nanohybrid: Epitaxial synthesis of Mo<sub>2</sub>C to augment the lithium storage properties of MoS<sub>2</sub>. **Carbon**, **2020**, **158**: 756-765.

[12] X. D. Zhang, K. L. Liu, S. J. Zhang, F. J. Miao, W. D. Xiao, Y. L. Shen, P. Zhang, Z. Wang, G. S. Shao, Enabling remarkable cycling performance of high-loading MoS<sub>2</sub>@Graphene anode for sodium ion batteries with tunable cut-off voltage.

**Journal of Power Sources, 2020, 458:** 228040.

[13] W. W. Zhan, M. Zhu, J. L. Lan, H. C. Yuan, H. J. Wang, X. P. Yang, G. Sui, All-in-One MoS<sub>2</sub> Nanosheets Tailored by Porous Nitrogen-Doped Graphene for Fast and Highly Reversible Sodium Storage. **Acs Applied Materials & Interfaces, 2020, 12(46):** 51488-51498.

[14] J. W. Sun, S. L. Jiao, G. Lian, L. Y. Jing, D. L. Cui, Q. L. Wang, C. P. Wong, Hierarchical MoS<sub>2</sub>/m-C@a-C@Ti<sub>3</sub>C<sub>2</sub> nanohybrids as superior electrodes for enhanced sodium storage and hydrogen evolution reaction. **Chemical Engineering Journal, 2021, 421:** 129680.

[15] X. L. Yu, C. M. Chen, R. X. Li, T. Yang, W. L. Wang, Y. Dai, Construction of SnS<sub>2</sub>@MoS<sub>2</sub>@rGO heterojunction anode and their half/ full sodium ion storage performances. **Journal of Alloys and Compounds, 2022, 896:** 162784.

[16] Yuxiang Luo, Xiaobo Ding, Xiangdong Ma, Dongdong Liu, Haikuo Fu, Xunhui Xiong, Constructing MoO<sub>2</sub>@MoS<sub>2</sub> heterostructures anchored on graphene nanosheets as a high-performance anode for sodium ion batteries. **Electrochimica Acta, 2021, 388:** 138612.

[17] H. Chen, T. B. Song, L. B. Tang, X. M. Pu, Z. Li, Q. J. Xu, H. M. Liu, Y. G. Wang, Y. Y. Xia, In-situ growth of vertically aligned MoS<sub>2</sub> nanowalls on reduced graphene oxide enables a large capacity and highly stable anode for sodium ion storage. **Journal of Power Sources, 2020, 445:** 227271.

[18] M. Feng, M. J. Zhang, H. Z. Zhang, X. H. Liu, H. B. Feng, Room-temperature carbon coating on MoS<sub>2</sub>/Graphene hybrids with carbon dioxide for enhanced sodium



storage. **Carbon**, **2019**, **153**: 217-224.

[19] S. Anwer, Y. X. Huang, B. S. Li, B. Govindan, K. Liao, W. J. Cantwell, F. Wu, R. J. Chen, L. X. Zheng, Nature-Inspired, Graphene-Wrapped 3D MoS<sub>2</sub> Ultrathin Microflower Architecture as a High-Performance Anode Material for Sodium-Ion Batteries. **Acs Applied Materials & Interfaces**, **2019**, **11**(25): 22323-22331.

[20] Z. Y. Li, S. Y. Liu, B. P. Vinayan, Z. Zhao-Karger, T. Diemant, K. Wang, R. J. Behm, C. Kubel, R. Klingeler, M. Fichtner, Hetero-layered MoS<sub>2</sub>/C composites enabling ultrafast and durable Na storage. **Energy Storage Materials**, **2019**, **21**: 115-123.
